# Supplementary material for: Effects of the Denitrification Inhibitor “Procyanidins” on the Diversity, Interactions, and Potential Functions of Rhizosphere-Associated Microbiome
Source: MDPI journal article supplement (doi:10.3390/microorganisms9071406), 2021-06-29
Supplement: s1 [file s1]

**Supplementary data:**

**Table S1.** Effect of lettuce and procyanidins amendment on 16S rRNA gene abundance in Manziat (A) and Serail (B). The analysis was performed using a Permutational Multivariate Analysis of Variance (PERMANOVA).

**Table S2.** Relative abundance of Archaea and Bacteria in bulk soil in Manziat and Serail (BSM and BSS, respectively), for Lettuce-planted conditions without and with procyanidins amendment in Manziat soil (LOM and LPM) and in Serail soil (LOS and LPS).

**Table S3.** Prokaryotic functional inference and KEGG assignment. Statically enriched functions in Manziat *versus* Serail were determined so as LDA score > 2.

**Table S4.** Global network statistics for microbial networks from the root-adhering soil of lettuce plants unamended and amended with procyanidins.

**Figure S1.** Rarefaction curves for each sample were calculated on prokaryotic 16S rRNA gene (A) and fungal ITS datasets (B).

**Figure S2. Trophic modes of fungal community.**
