# Supplementary material for: Effects of the Denitrification Inhibitor “Procyanidins” on the Diversity, Interactions, and Potential Functions of Rhizosphere-Associated Microbiome
Source: MDPI journal article supplement (doi:10.3390/microorganisms9071406), 2021-06-29
Supplement: s1 [file s1]

## *Unamended lettuce*

## *Procyanidin amended lettuce*

Serail

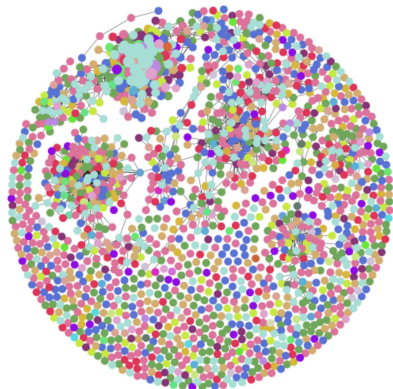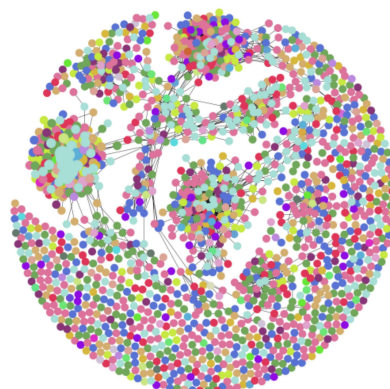

Manziat

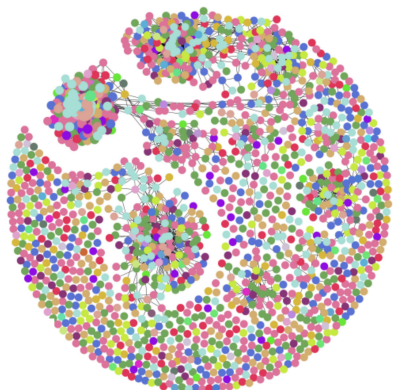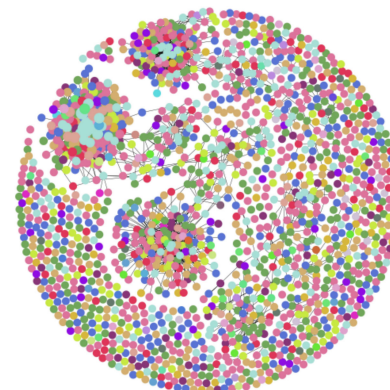

- Acidobacteria
- Actinobacteria
- Armatimonadetes
- Bacteroidetes
- BRC1
- Chloroflexi
- Cyanobacteria
- Dadabacteria
- Dependitiae
- Elusimicrobia
- Entothionellaeota
- Euryarchaeota
- Fibrobacteres
- Firmicutes
- Gemmatimonadetes
- Latescibacteria
- Nitrospirae
- P-Multi-affiliation
- Planctomycetes
- Proteobacteria
- Rokubacteria
- Spirochaetes
- Thaumarchaeota
- Verrucomicrobia
- WS2
- Ascomycota
- Basidiomycota
- Chytridiomycota
- F-Multi-affiliation
- F-Unidentified
- Glomeromycota
- Mortierellomycota
- Mucoromycota
- Olpidiomycota
- Rozellomycota
