# Supplementary material for: Effects of the Denitrification Inhibitor “Procyanidins” on the Diversity, Interactions, and Potential Functions of Rhizosphere-Associated Microbiome
Source: MDPI journal article supplement (doi:10.3390/microorganisms9071406), 2021-06-29
Supplement: s1 [file s1]

A)

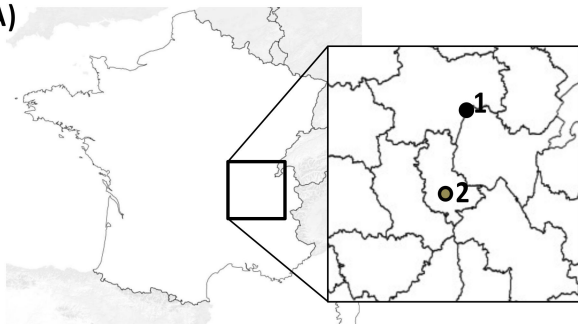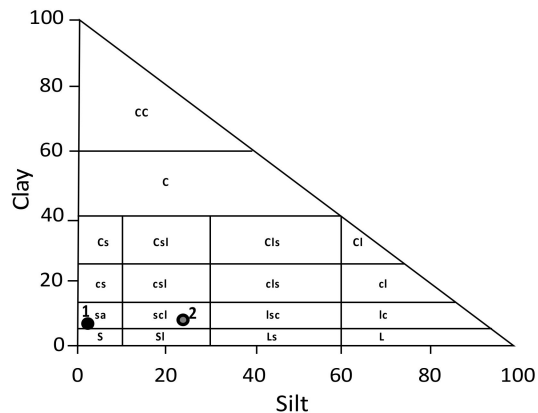

B)

### ➤ Experimental design

Seraïl & Manziat soils

Lettuce soil unamended with procyanidins

|                    |
|--------------------|
| 80 Lettuces plot 1 |
| 80 Lettuces plot 2 |
| 80 Lettuces plot 3 |
| 80 Lettuces plot 4 |

Lettuce soil amended with procyanidins at 210 kg ha<sup>-1</sup>

|                    |
|--------------------|
| 80 Lettuces plot 1 |
| 80 Lettuces plot 2 |
| 80 Lettuces plot 3 |
| 80 Lettuces plot 4 |

Unplanted soil

|                       |
|-----------------------|
| Unplanted soil plot 1 |
| Unplanted soil plot 2 |
| Unplanted soil plot 3 |
| Unplanted soil plot 4 |

### ➤ Harvesting strategy

Soil analysis in duplicates

Pool of rhizospheric soil from 4 lettuces per plots X 2 plots

Samples of bulk soil from 2 plots per treatment

DNA extraction for microbial diversity analysis in triplicates

Pool of rhizospheric soil from 4 lettuces per plots X 3 plots

Samples of bulk soil from 3 plots per treatment
