# Supplementary material for: Effects of the Denitrification Inhibitor “Procyanidins” on the Diversity, Interactions, and Potential Functions of Rhizosphere-Associated Microbiome
Source: Microorganisms. 2021 Jun 29;9(7):1406. doi: 10.3390/microorganisms9071406 (PMC8306639; doi:10.3390/microorganisms9071406)
Supplement: Supplementary file 1 [file microorganisms-09-01406-s001.zip]

Archive with 4 entries (4 files):
- microorganisms-1269648.pdf
- microorganisms-1269648.zip
- microorganisms-1269648-supplementary.zip
- microorganisms-1269648-tex.zip
