# Supplementary figures and images for: Effects of the Denitrification Inhibitor “Procyanidins” on the Diversity, Interactions, and Potential Functions of Rhizosphere-Associated Microbiome
Source: MDPI journal article supplement (doi:10.3390/microorganisms9071406), 2021-06-29

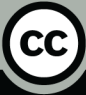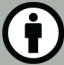

BY

Supplement: s1 [file s1]

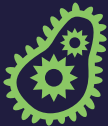

*microorganisms*

Supplement: s1 [file s1]

A)

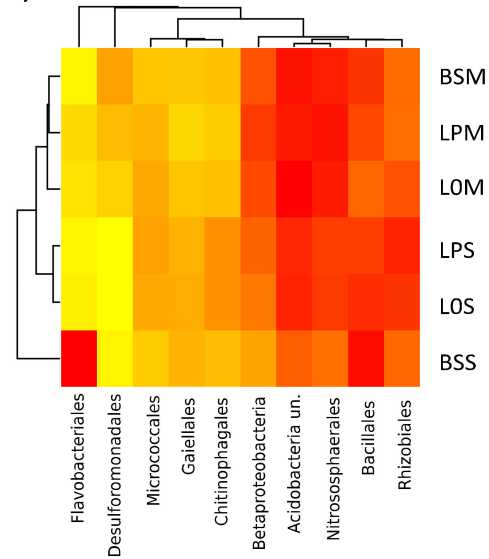

B)

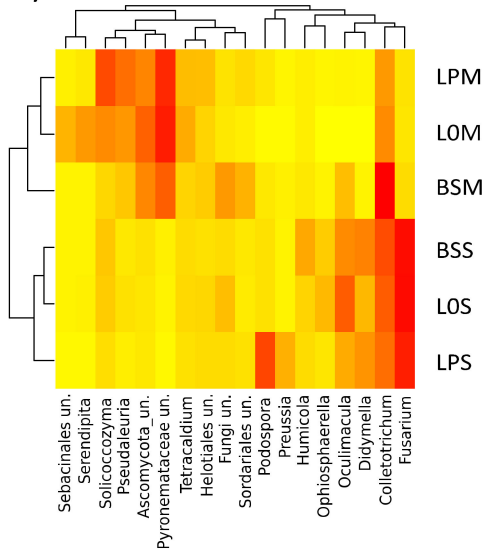

Supplement: s1 [file s1]

**A)**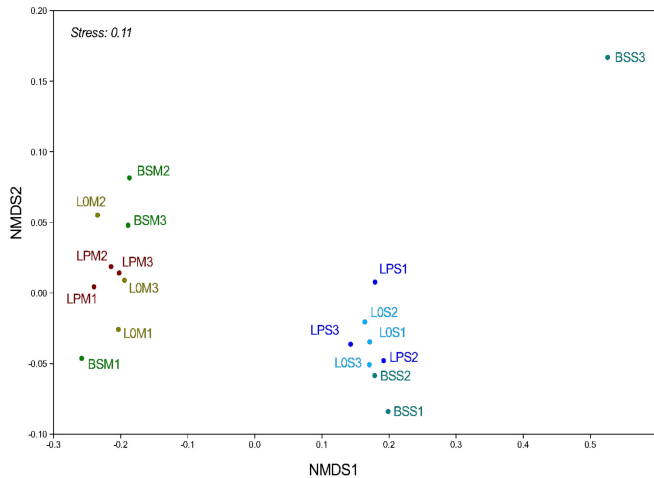**B)**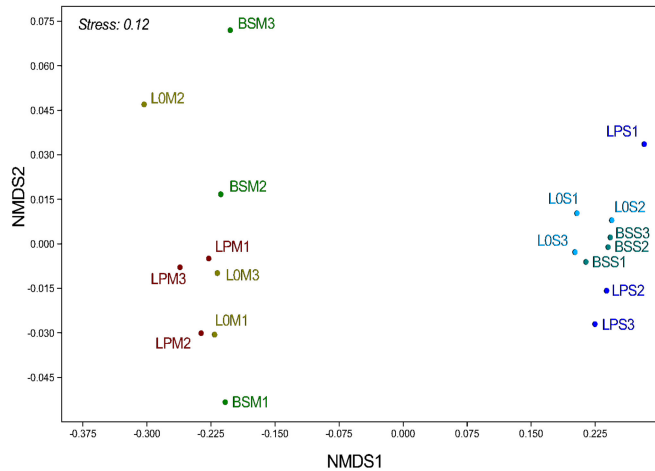

Supplement: s1 [file s1]

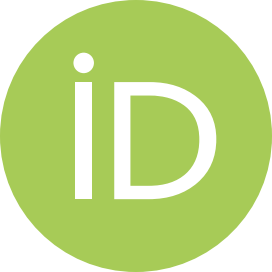

Supplement: s1 [file s1]

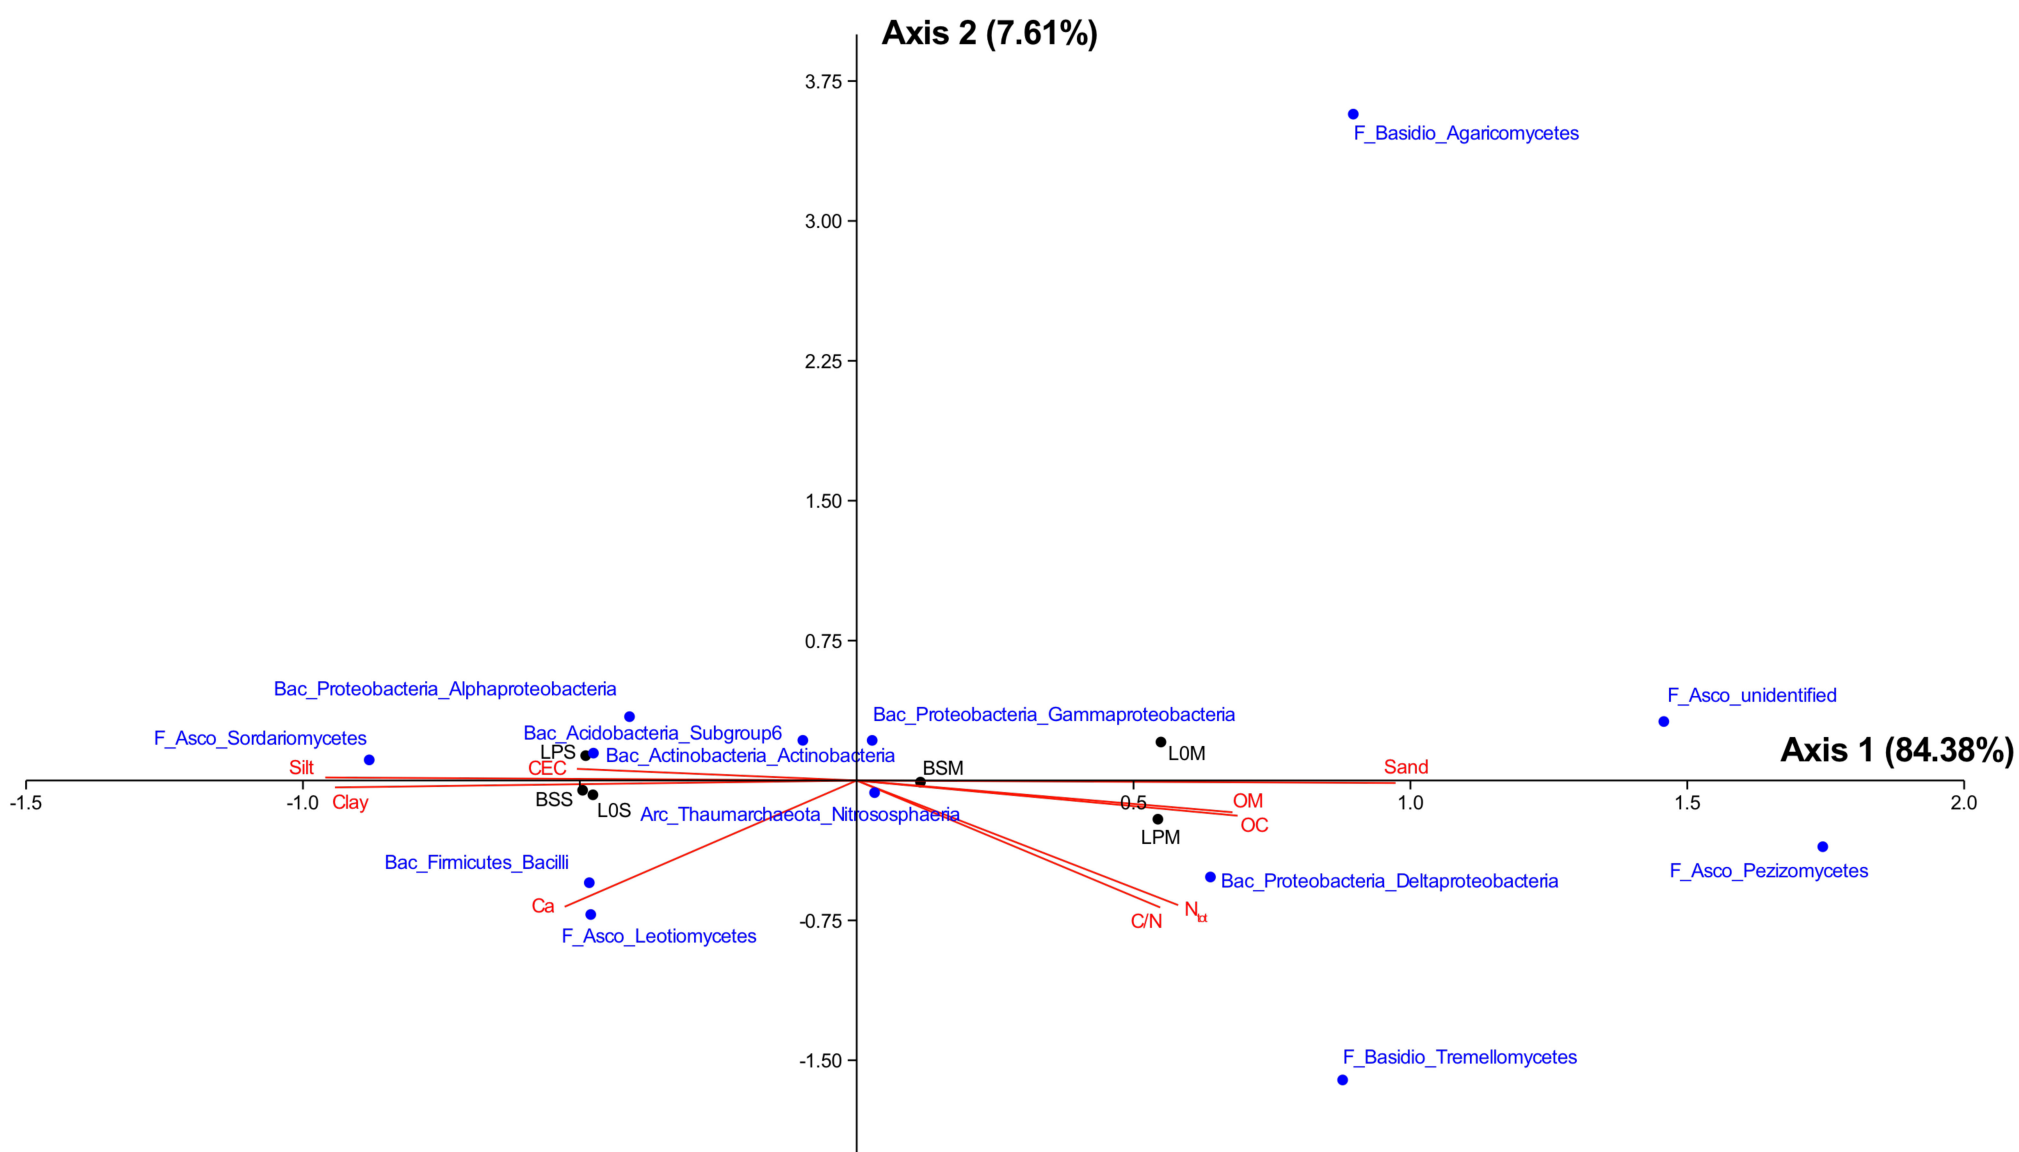

Supplement: s1 [file s1]

A)

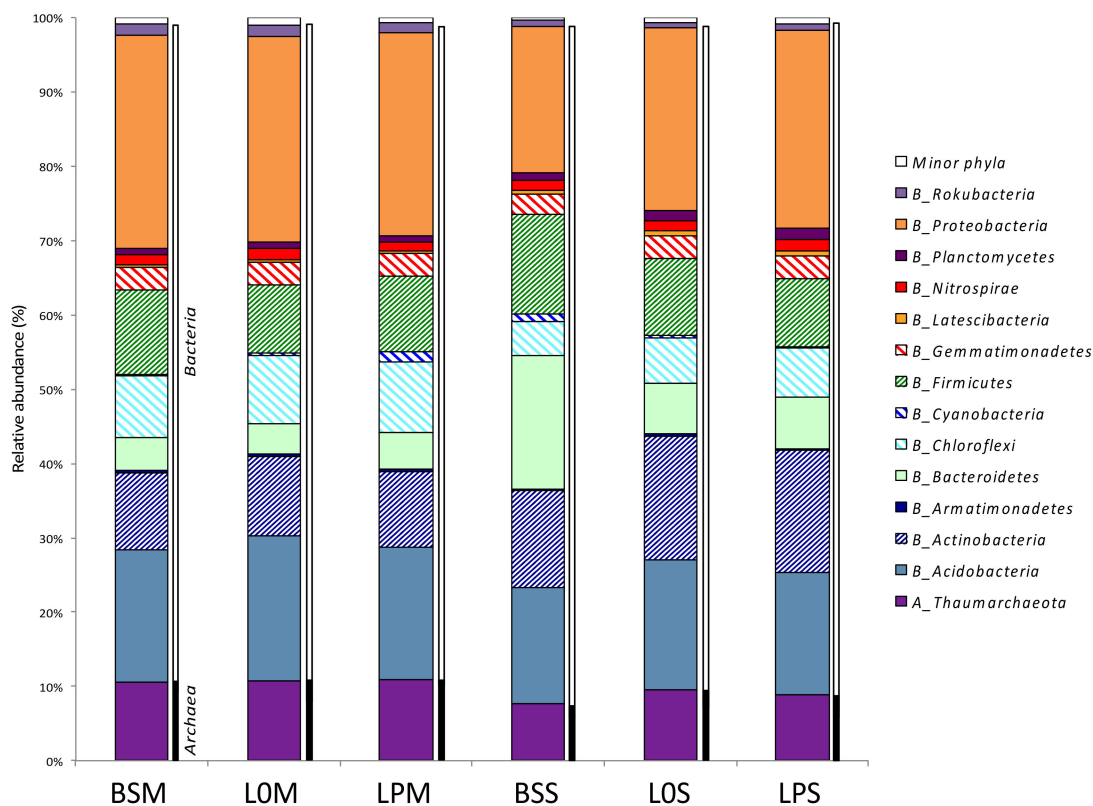

B)

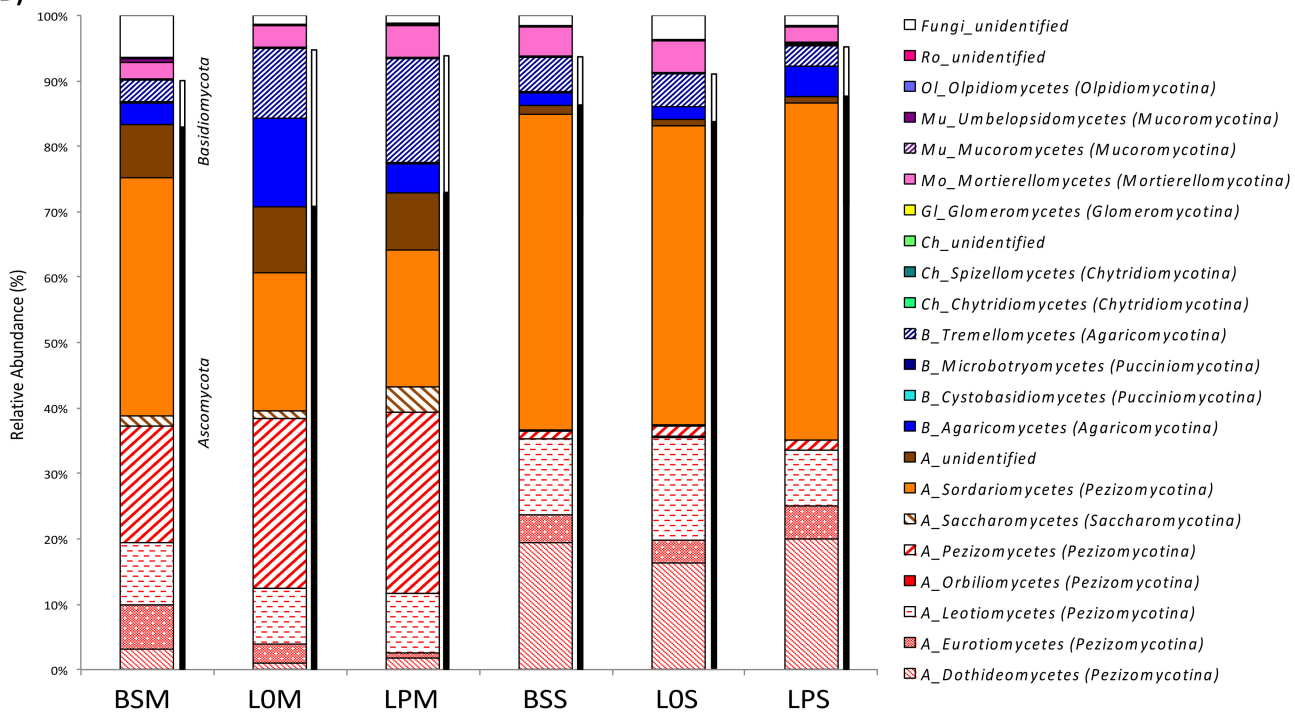

Supplement: s1 [file s1]

A.

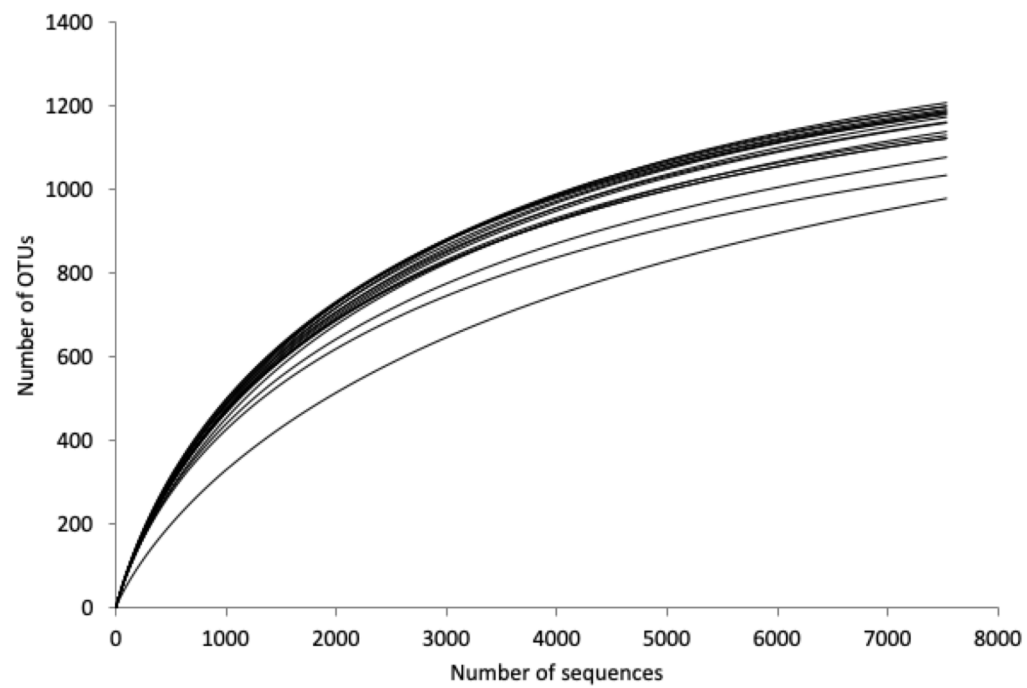

B.

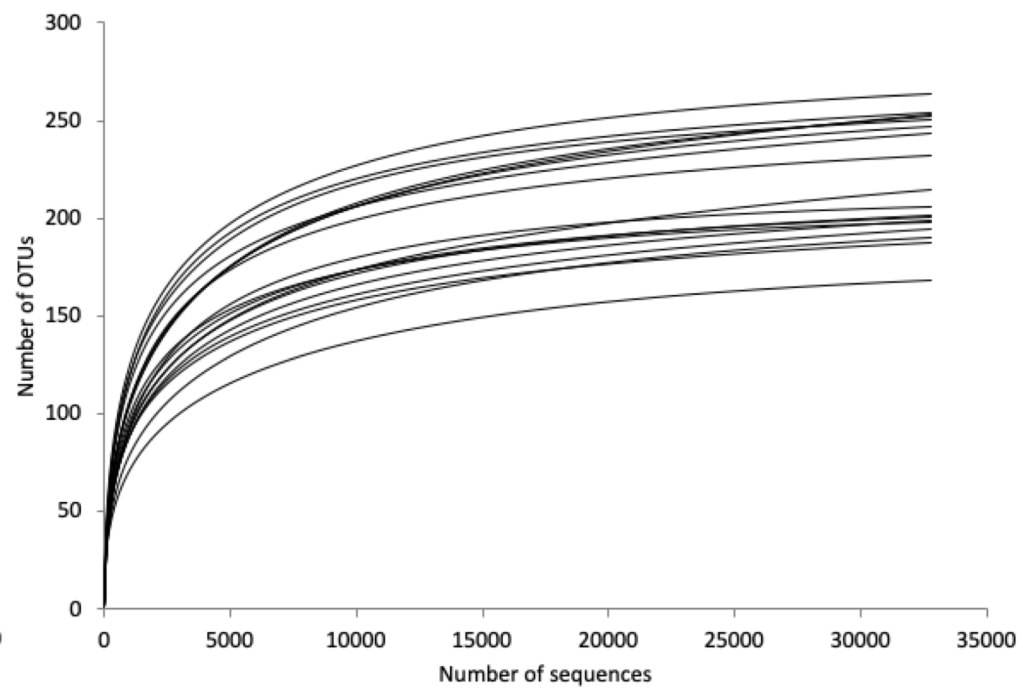

Supplement: s1 [file s1]

## A) 16S rRNA genes

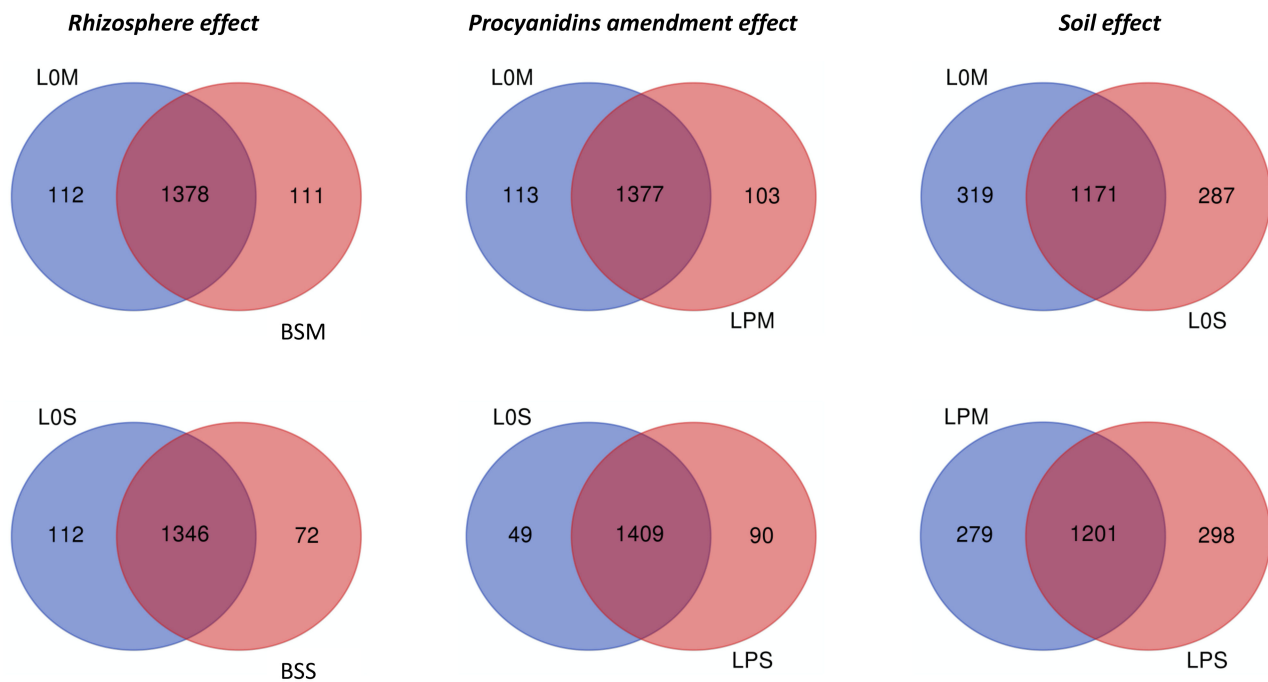

## B) Fungal ITS

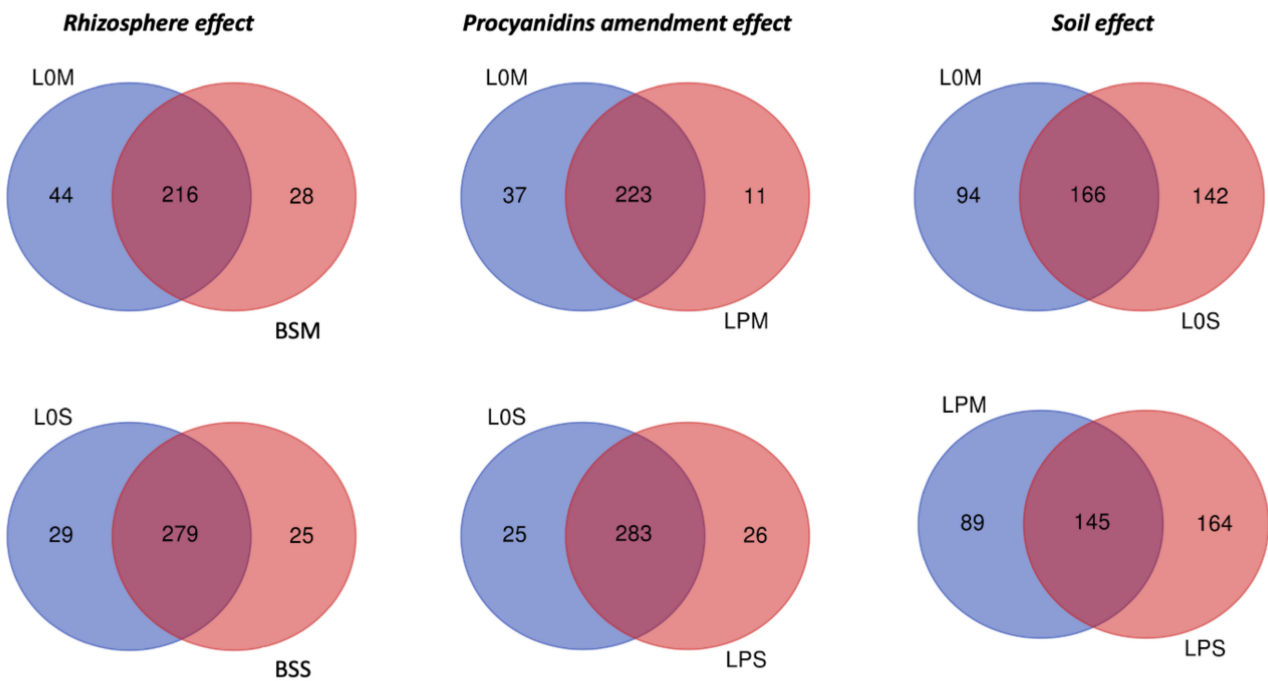

Supplement: s1 [file s1]

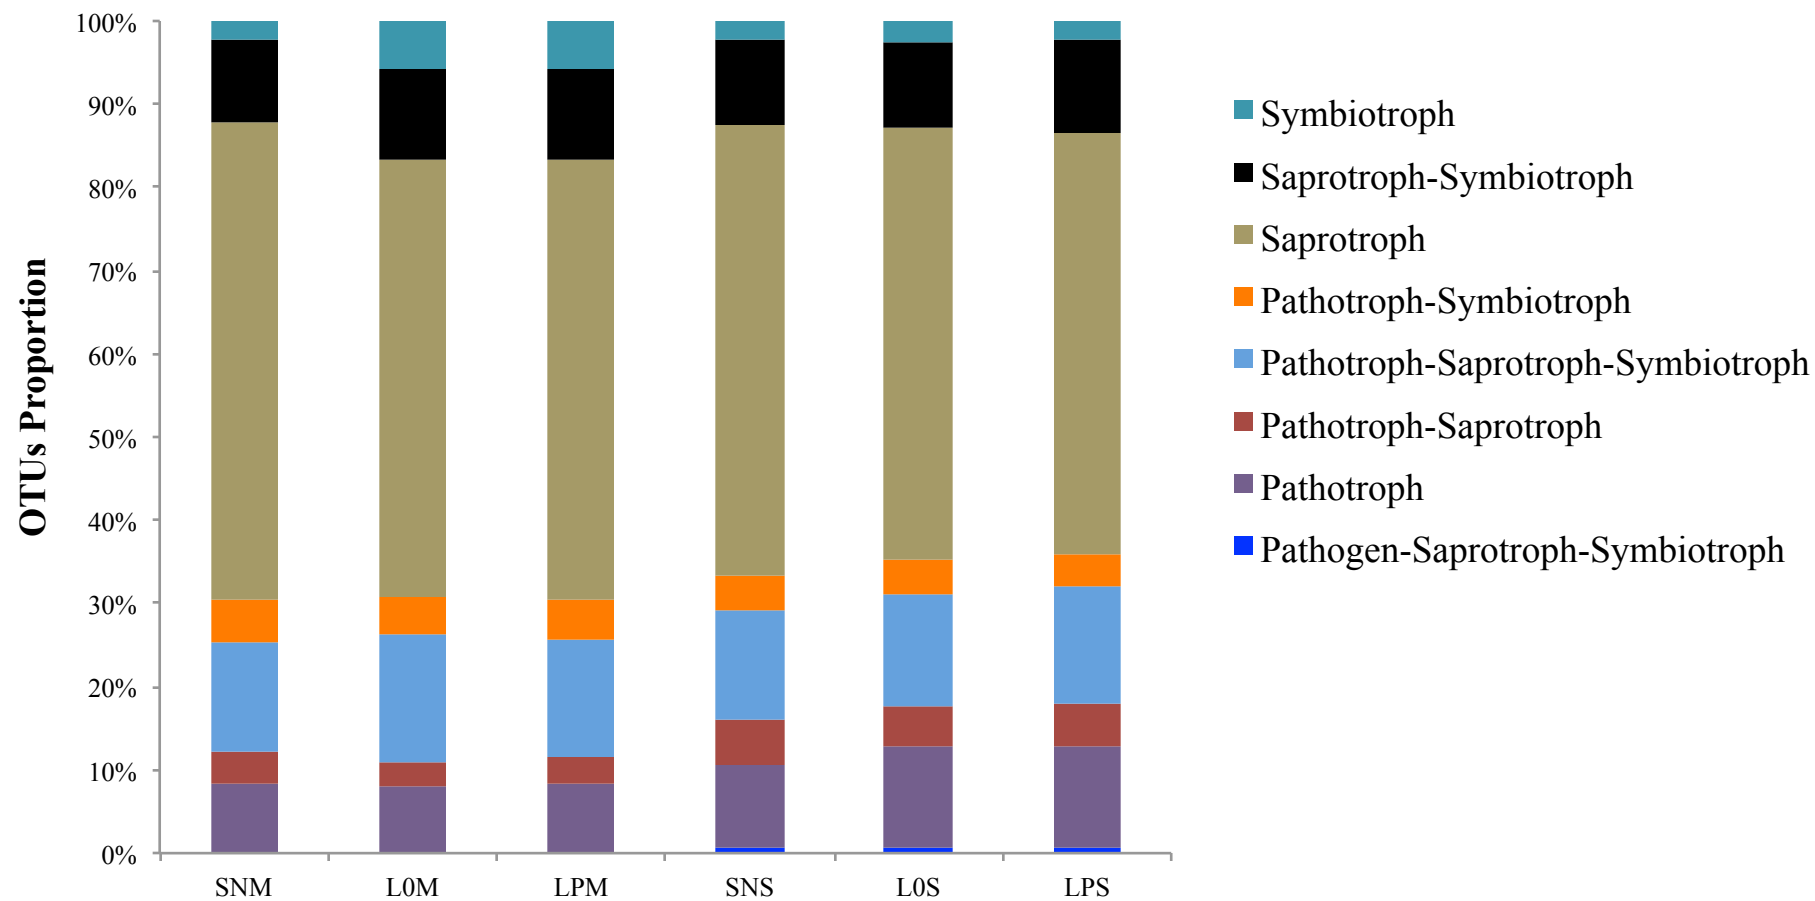

Supplement: s1 [file s1]
